# Supplementary material for: Diffusion MRI as A Biomarker for Monitoring Recovery After Surgical Repair of Traumatic Peripheral Nerve Injuries: A Longitudinal Case Series
Source: Research Square preprint supplement (doi:10.21203/rs.3.rs-9282445/v1), 2026-04-28
Supplement: Supplementary file 1 [file 512ebf0eece60d2422604ba0.docx]

|  |
| --- |
| **Supplemental Figure 1.** Graphical representation of the MRI workflow implemented in this study. A) Overview of the acquisition and analysis pipeline. B) T1W and T2W anatomical images are used to identify the nerve and classify segments based on shape and appearance. Anatomical feature extraction divides each nerve into three regions: Proximal, Injury, and Distal. C) Diffusion-weighted EPI data are processed to generate FA maps. D) Slice-wise FA profiles are extracted from the FA maps according to these three regions, producing a continuous FA profile along the nerve. E) The FA profile is then fitted with a Gompertz function. The fit yields quantitative parameters describing nerve status: FA₀, the upper asymptote representing the proximal (healthy) region; FATarget, the lower asymptote reflecting the distal region closer to the muscle end target; ∆FA, the difference between FA₀ and FATarget; and FAI, the FA value at the inflection point xI, located in the transition zone. |
